# Supplementary material for: Anti-cancer effect of hUC-MSC-derived exosome-mediated delivery of PMO-miR-146b-5p in colorectal cancer
Source: Research Square preprint supplement (doi:10.21203/rs.3.rs-1704679/v1), 2022-06-02
Supplement: Supplementary file 1 [file eaa2359c4d7304f6c36a2466.docx]

**Table S1. Oligonucleotide and primer sequences.**

| Name | Sequence (5’-3’) |
| --- | --- |
| NC | CCTCTTACCTCAGTTACAATTTATA |
| has-anti-miR-146b-5p ASO | CACAGCCTATGGAATTCAGTTCTCA |
| miR-146b RT | GTCGTATCCAGTGCGTGTCGTGGAGTCGGCAATTGCACTGGATACGACAGCCTATG |
| miR-146b F | GGGCGGTGAGAACTGAATT |
| miR-146b R | CAGTGCGTGTCGTGGAGT |
| U6 F | CTCGCTTCGGCAGCACA |
| U6 R | AACGCTTCACGAATTTGCGT |

All primers correspond to *homo sapiens*.
